# Supplementary material for: Single polymeric microfiber waveguide platform for sensitive detection and discrimination of DNA methylation
Source: Royal Society of Chemistry journal article supplement (doi:10.1039/d1an02243a), 2022-01-01
Supplement: d1an02243a1.pdf [file d1an02243a1.pdf]

## Supporting information

### **Sensitive detection of DNA and DNA methylation using chitosan fiber waveguide platform**

*Kexin Yang<sup>a</sup>, Xiaohui Feng<sup>b</sup>, Gaoyuan Yu<sup>b</sup>, Funing Liu<sup>a</sup>, Wenjie Han<sup>a</sup>, Yifan Xie<sup>a</sup>, Hongli Zhang<sup>a</sup>, Yue Yu<sup>b\*</sup>, Gang Zou<sup>a\*</sup>*

<sup>a</sup> Department of Polymer Science and Engineering, University of Science and Technology of China, 96 Jinzhai Road, Hefei 230026, China. Email: [gangzou@ustc.edu.cn](mailto:gangzou@ustc.edu.cn)

<sup>b</sup> Division of Gastroenterology, The First Affiliated Hospital of USTC, Division of Life Science and Medicine, University of Science and Technology of China, Hefei, Anhui 230026, P. R. China. E-mail: [yuyuemd@ustc.edu.cn](mailto:yuyuemd@ustc.edu.cn)

<sup>c</sup> Undergraduate major in clinical medicine, grade 2017, class 1, Medical College of Hubei University of Science and Technology, Xianning, Hubei 437100, P. R. China.

## **Table of content**

|                                                                                                                                 |    |
|---------------------------------------------------------------------------------------------------------------------------------|----|
| 1. Overview of DNAs used in this work.....                                                                                      | 3  |
| 2. Scheme illustration for preparation process of Probe 1 modified PDA microtube and Probe 2 modified Au nanoparticles.....     | 4  |
| 3. SEM and fluorescence emission spectra of chitosan fiber.....                                                                 | 5  |
| 4. XPS spectra of chitosan fiber before and after DNA modification.....                                                         | 6  |
| 5. TEM and UV absorption spectrum of synthesized Au nanoparticles.....                                                          | 7  |
| 6. Raman spectroscopy and DLS analysis of Au nanoparticles before and after DNA modification.....                               | 8  |
| 7. SEM and EDS spectrum of chitosan fiber before and after sandwich structure forming process.....                              | 9  |
| 8. Anti-interference performance of the single fluorescent polymeric microfiber platform in complex biological environment..... | 10 |

Table S1 DNAs used in this work.

| Name                       | Sequence                                     |
|----------------------------|----------------------------------------------|
| Probe 1                    | 5'-NH <sub>2</sub> -GCCGGACGCCTG-3'          |
| Probe 2                    | 5'-GAACGCAACTCC-SH-3'                        |
| Unmethylated p16           | 5'-GGAGTTGCGTTCCAGGCGTCCGGC-3'               |
| Methylated p16             | 5'-GGAGTTGCGTTCCAGGCGTCC <sup>m</sup> GGC-3' |
| single-base mismatched p16 | 5'-GGTGTTCGTTCCAGGCGTCC <sup>m</sup> GGC-3'  |
| three base mismatched p16  | 5'-GGTGTTCCTTCCTGGGCGTCC <sup>m</sup> GGC-3' |
| RASSF1A                    | 5'-CCGGCGTGGGCCGACCTCGC-3'                   |
| p53                        | 5'-GGCACAAACACGCACCTCAA-3'                   |

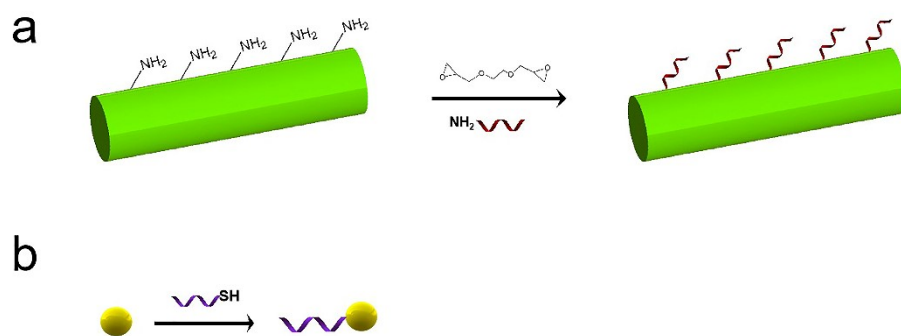

**Fig. S1** (a) Scheme illustration for preparation process of Probe 1 modified PDA microtube. (b) Scheme illustration for preparation process of Probe 2 modified Au nanoparticles.

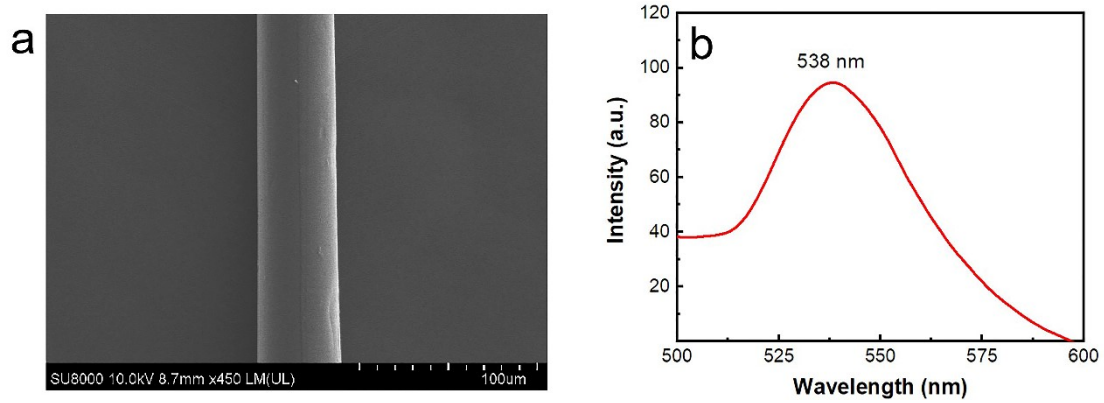

**Fig. S2** (a) Scanning electron micrograph of chitosan fiber. (b) Fluorescence emission spectra of chitosan fiber.

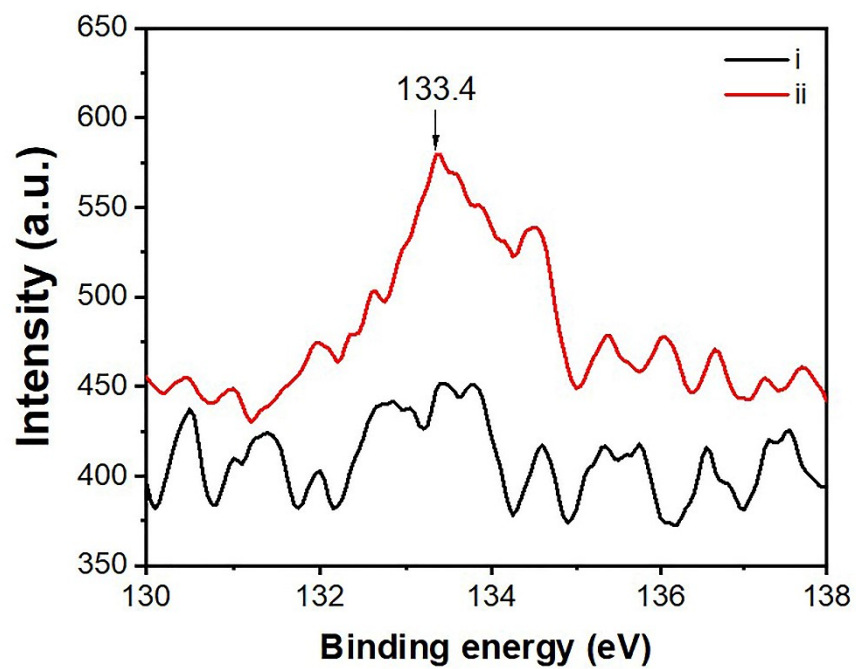

**Fig. S3** P 2p XPS spectra of chitosan fiber (i) before and (ii) after DNA modification.

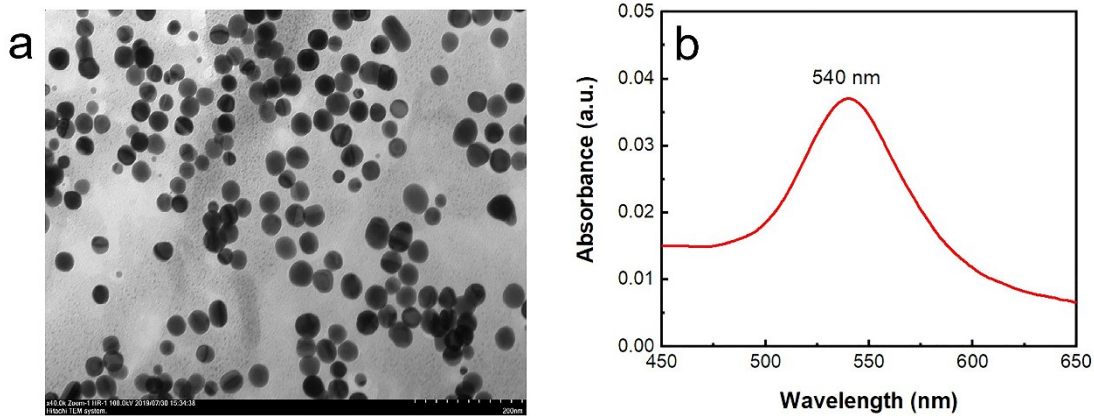

**Fig. S4** (a) TEM picture of Au nanoparticles. (b) UV absorption spectrum of Au nanoparticles.

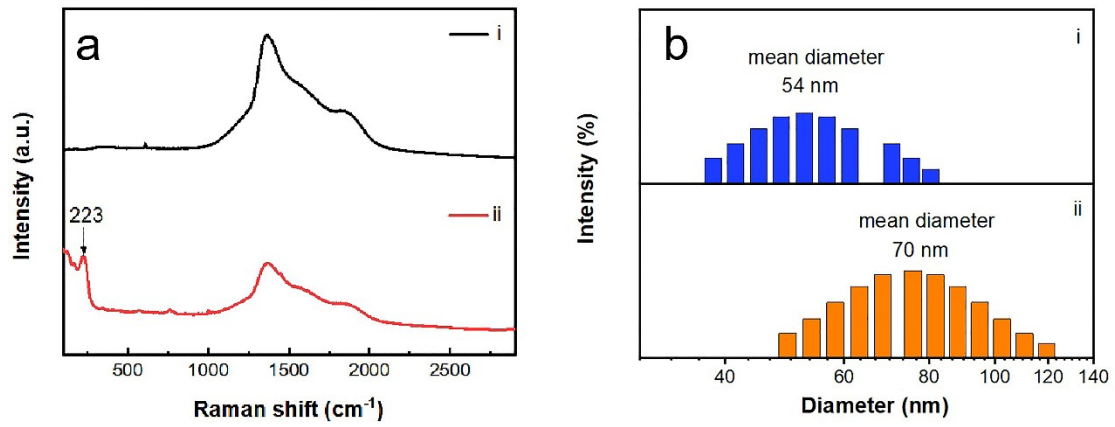

**Fig. S5** (a) Raman spectroscopy of Au nanoparticles (i) before and (i) after DNA modification. (b) Dynamic light scattering analysis of Au nanoparticles (i) before and (i) after DNA modification.



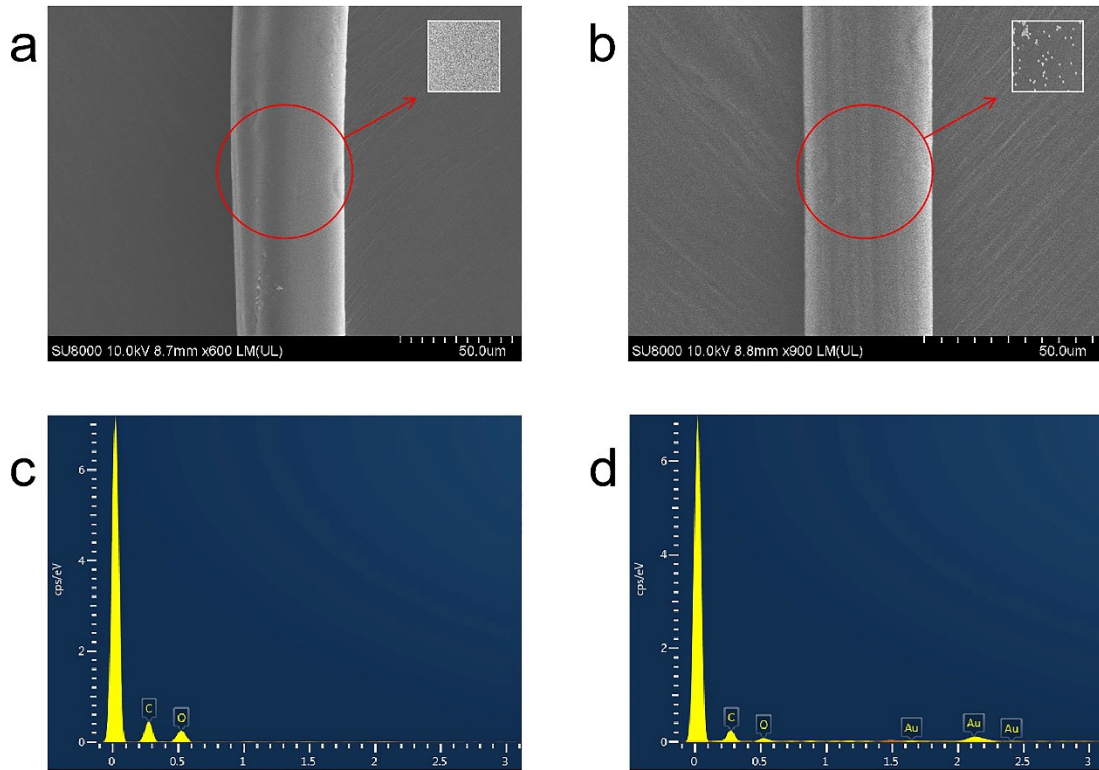

**Fig. S6** SEM image of chitosan fiber (a) before and (b) after the sandwich structure forming process. Energy Dispersive Spectrometer of chitosan fiber (c) before and (d) after sandwich structure forming process.

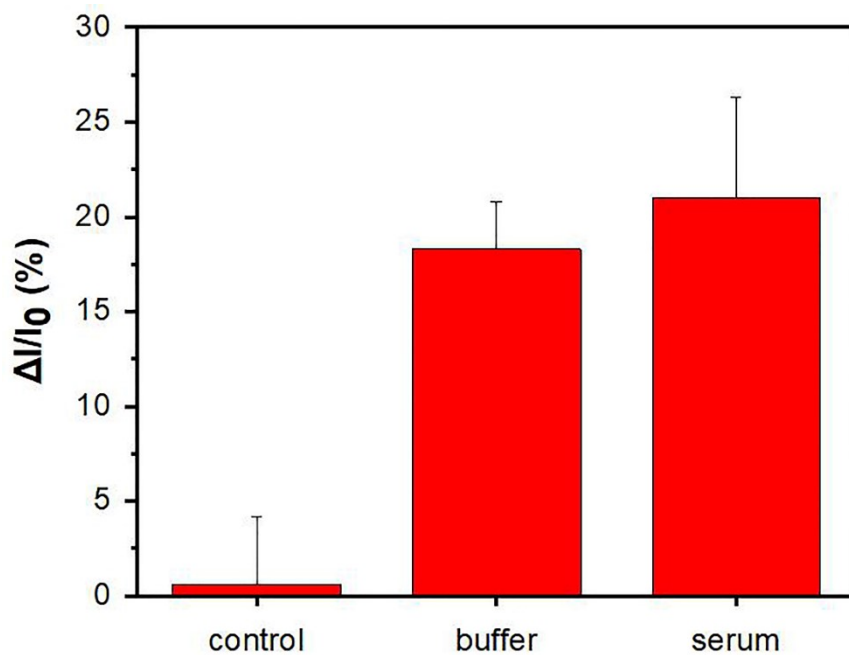

**Fig. S7** The fluorescence variation of tip emission for single chitosan fiber after reaction in control solution (without p16), in TAE buffer (with 10 nM p16) and in the buffer mixture solution containing 50% diluted bovine serum (with 10 nM p16).
